# Supplementary material
Source: HighWire-hosted journal article supplement (https://jnm.snmjournals.org/highwire/filestream/95453/field_highwire_adjunct_files/0/221671_Supplemental_Data.pdf)
Supplement: 221671_Supplemental_Data.pdf [file 221671_Supplemental_Data.pdf]

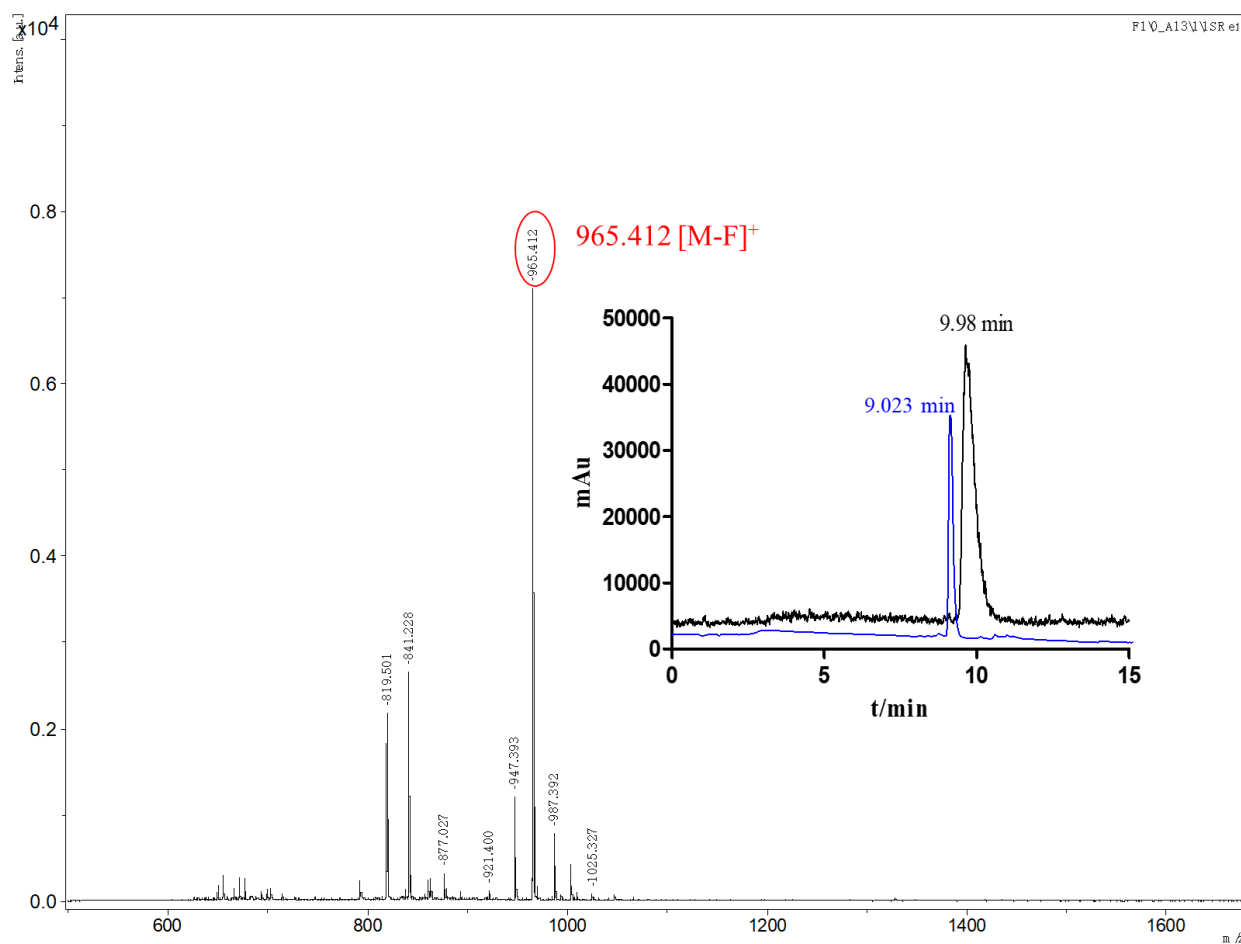

**Supplemental Figure 1. A:** ESI-MS chromatogram of Al<sup>19</sup>F-PSMA-BCH and HPLC chromatogram of co-injection of Al<sup>19</sup>F-PSMA-BCH (blue) and Al<sup>19</sup>F-PSMA-BCH (black). The mobile phase was a mixture of MeCN/0.1% TFA (A) and H<sub>2</sub>O/0.1% TFA (B); 5%-60% B in 0-15 min; flow rate: 1 mL/min.

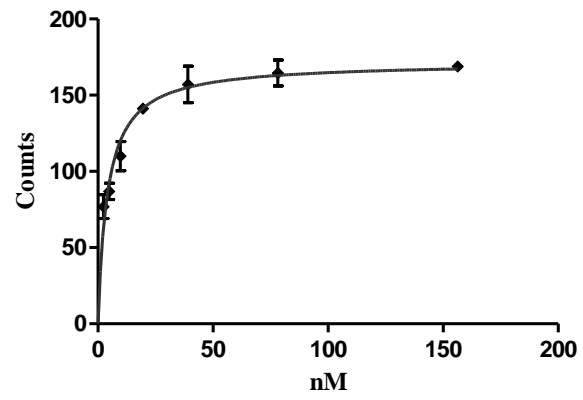

**Supplemental Figure2.** Binding saturation curve of Al<sup>18</sup>F-PSMA-BCH to PSMA in 22Rv1 cell lines.

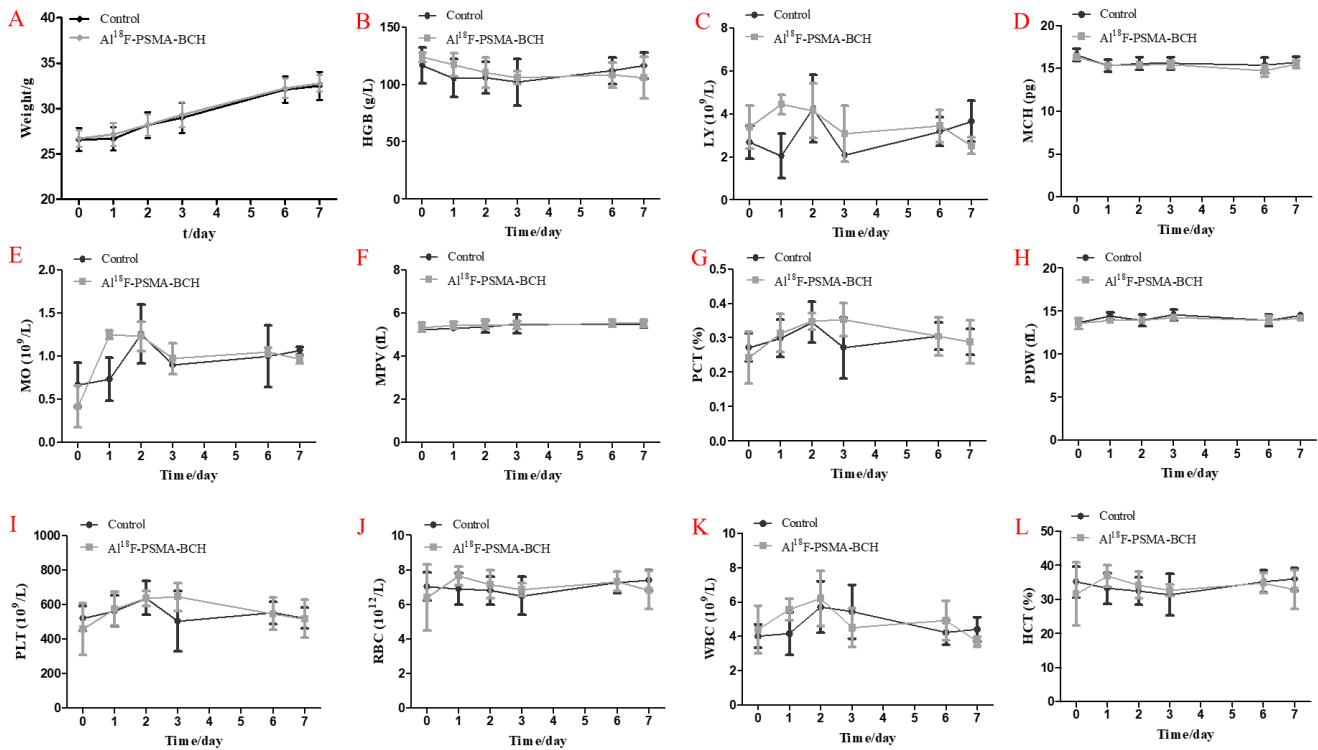

**Supplemental Figures 3.** A: The weight of mice in radiotoxicity study of Al<sup>18</sup>F-PSMA-BCH (n=7). B-L: Result of radiotoxicity studies of Al<sup>18</sup>F-PSMA-BCH (40 mCi/kg). HCT (hematocrit), HGB (hemoglobin), LY (absolute value of lymphocytes), MCH (mean corpuscular hemoglobin), MO (absolute value of monocyte), MPV (mean platelet volume), PCT (platelet counts), PDW (platelet distribution width), PLT (platelet counts), RBC (red blood cell count), WBC (white blood count).

**Supplemental table 1.** Biodistribution of Al<sup>18</sup>F-PSMA-BCH with/without ZJ-43 (50 µg/mice) in mice bearing both tumors of 22Rv1 and PC-3 (60 min p.i., X±SD, n=4)

|                 | Non-blocked | ZJ-43 blocked |
|-----------------|-------------|---------------|
| Heart           | 0.36 ±0.04  | 0.10 ±0.04    |
| Liver           | 0.16±0.06   | 0.11±0.05     |
| Lung            | 0.42 ±0.17  | 0.15 ±0.07    |
| Kidney          | 14.15±2.32  | 1.27±0.10     |
| Spleen          | 0.61 ±0.13  | 0.18 ±0.07    |
| Stomach*        | 0.22 ±0.05  | 0.12 ±0.05    |
| Bone            | 1.59±0.07   | 1.57±0.07     |
| Muscle          | 0.37 ±0.08  | 0.09 ±0.01    |
| Large intestine | 0.75 ±0.09  | 0.14 ±0.04    |
| Small intestine | 1.36 ±0.20  | 0.17 ±0.08    |
| 22Rv1           | 7.87 ±2.37  | 0.46 ±0.11    |
| PC-3            | 0.54 ±0.22  | 0.53 ±0.16    |
| Blood           | 0.18 ±0.05  | 0.15 ±0.05    |
| Brain           | 0.09 ±0.02  | 0.03 ±0.01    |

\* The data of stomach was measured with content.

**Supplemental table 2.** Organ biodistribution of Al<sup>18</sup>F-PSMA-BCH in newly diagnosed PCa patients

(SUV<sub>mean</sub>, X±SD, n=11)

|                      | SUV <sub>mean</sub> |             | SUV <sub>max</sub> |             |
|----------------------|---------------------|-------------|--------------------|-------------|
|                      | 1 h                 | 2 h         | 1 h                | 2 h         |
| Submandibular glands | 10.77±3.06          | 13.22±4.01* | 14.03±4.34         | 17.25±5.67* |
| Parotid glands       | 7.10±1.67           | 9.06±2.46*  | 9.39±2.57          | 11.92±4.22* |
| Lacrimal glands      | 6.41±2.32           | 8.14±2.96*  | 8.49±3.47          | 11.21±5.58* |
| Kidneys              | 16.26±1.75          | 19.52±2.62* | 23.81±3.83         | 26.67±4.89* |
| Liver                | 4.63±0.93           | 4.50±0.85   | 8.09±3.87          | 5.75±1.90   |
| Spleen               | 5.46±1.34           | 5.19±1.37   | 6.79±1.78          | 6.63±2.08   |
| Heart                | 2.44±0.37           | 2.01±0.26*  | 3.31±0.60          | 2.89±1.00   |
| Colon                | 1.16±0.24           | 1.07±0.28   | 2.89±0.81          | 2.05±0.61*  |
| Small Intestine      | 4.48±1.65           | 5.58±1.72   | 7.02±2.75          | 11.53±5.76  |
| Pancreas             | 2.01±0.36           | 1.83±0.31   | 3.01±0.44          | 2.71±0.80   |
| Muscle               | 0.51±0.13           | 0.44±0.10   | 1.30±0.63          | 0.95±0.31   |
| Marrow               | 1.35±0.29           | 1.35±0.28   | 2.09±0.58          | 1.81±0.50   |
| Lung                 | 0.80±0.18           | 0.71±0.16   | 1.67±0.27          | 1.37±0.54   |
| Bone                 | 0.45±0.23           | 0.54±0.21   | 0.85±0.50          | 0.91±0.53   |
| Brain                | 0.18±0.06           | 0.16±0.05   | 1.80±0.81          | 1.45±0.63   |
| Gallbladder          | 1.72±0.55           | 2.25±0.72   | 2.45±0.90          | 2.78±0.48   |

\*Significance of differences between 1 h and 2 h: \*: P<0.05

**Supplemental Table 3.** Time-Integrated Activity Coefficients [h] of Al<sup>18</sup>F-PSMA-BCH (n=11)

| Source organ            | Mean [h] | SD       |
|-------------------------|----------|----------|
| kidneys                 | 2.27E-01 | 5.69E-02 |
| Salivary glands         | 3.12E-02 | 7.33E-03 |
| Spleen                  | 2.75E-02 | 2.13E-02 |
| Liver                   | 1.77E-01 | 5.16E-02 |
| Urinary bladder content | 4.10E-02 | 1.37E-02 |
| Stomach                 | 1.14E-02 | 3.97E-03 |
| Gallbladder             | 9.15E-04 | 4.45E-04 |
| Pancreas                | 3.99E-03 | 2.00E-03 |
| Small intestine         | 4.42E-02 | 1.52E-02 |
| Heart                   | 5.94E-02 | 1.16E-02 |
| Lung                    | 7.58E-02 | 2.82E-02 |
| Thyroid                 | 4.24E-04 | 1.10E-04 |
| Red bone marrow         | 6.67E-03 | 2.50E-03 |
| Bone                    | 5.89E-02 | 2.45E-02 |
| Colon                   | 1.06E-02 | 3.58E-03 |
| Muscle                  | 3.22E-01 | 4.22E-02 |
| Brain                   | 6.61E-03 | 2.50E-03 |
| Whole body              | 1.27E-00 | 2.11E-01 |
